# Supplementary material for: A long-term drought reconstruction based on oxygen isotope tree ring data
Source: Copernicus journal article supplement (doi:10.5194/egusphere-2024-2144), 2024-07-30
Supplement: Supplementary file [file egusphere-2024-2144-AC1-supplement.pdf]

The reviewed manuscript presents a new oxygen stable isotope chronology measured in cellulose extracted from annual growth-rings of oak trees, which originated from the area of Letea Forest, Romania. This chronology is over 200 years old and was used to reconstruct the August Standardised Precipitation Evapotranspiration Index (for an accumulation period of 9-months - SPEI9) in the area of central and eastern Europe. The paper also discusses the interannual and decadal variability evident in the obtained palaeoclimatic reconstruction, resulting from the occurrence of dry and wet periods associated with large-scale atmospheric and oceanic circulation patterns. The new stable oxygen isotope chronology proved to be an effective tool for reconstructing past hydroclimatic variability in the Letea Forest of the Danube River delta and in central and eastern Europe. This makes the reviewed article an important contribution to the issues of past climate research.

The manuscript has an appropriate text structure, is written in clearly formulated language and the individual chapters present the subsequent topics in sufficient detail. The accompanying table and Figures enable a better understanding of the descriptions. The authors also refer to previous studies of a similar type in the neighbouring areas, discussing and comparing the results obtained. The article is of high scientific value and I recommend it for publication.

We want to thank the reviewer for the appreciation/suggestions/comments/feedback that will help us improve our manuscript, and for taking the time to read and review our paper. Moreover, we are pleased that the reviewer clearly emphasizes the scientific importance of our manuscript.

Some 'specific comments' and 'technical corrections' are contained in the attached version of the manuscript.

We carefully revised all the suggestions and the different technical annotations from the attached file, we agree with the reviewer and will implement them in the revised version of the manuscript by improving our manuscript according to the reviewer's suggestions.
